# Supplementary material for: Diagnostic Performance and Clinical Utility of Conventional PCR Assay in Early Diagnosis of COVID-19 Associated Rhino-Orbito-Cerebral Mucormycosis
Source: MDPI journal article supplement (doi:10.3390/jof8080844), 2022-08-11
Supplement: s1 [file s1]

## SUPPLEMENTARY TABLES:

**Table S1 : Baseline characteristics of patients (n=33)**

| Characteristics                                   | No of Patients (%) | Characteristics                                                       | No of Patients (%) |
|---------------------------------------------------|--------------------|-----------------------------------------------------------------------|--------------------|
| <b>1) Gender</b>                                  |                    | Home Isolation                                                        | 17 (51.52 %)       |
| Male                                              | 24 (72.73%)        | Oxygen Therapy                                                        | 12 (36.36%)        |
| Female                                            | 09 (27.27%)        | Corticosteroid Therapy                                                | 15 (45.45%)        |
| <b>2) Age Groups (in years)</b>                   |                    | Ventilator Support                                                    | 04 (12.12%)        |
| <20 years                                         | 0 (00.00%)         | <b>7) Co-morbidities</b>                                              |                    |
| 20-40 years                                       | 05 (15.15%)        | Preexisting Diabetes                                                  | 19 (57.57%)        |
| 41-60 years                                       | 23 (69.70%)        | Diabetes developed during COVID treatment                             | 03 (09.09%)        |
| > 60 years                                        | 05 (15.15%)        | Hypertension                                                          | 05 (15.15%)        |
| <b>3) VA at Presentation</b>                      |                    | CHD with L-R shunt                                                    | 01 (03.03%)        |
| 20/20-20/40                                       | 18 (54.55%)        | Bronchitis with COPD                                                  | 02 (06.06%)        |
| 20-50-20/200                                      | 07 (21.21%)        | <b>8) Duration between onset of symptoms and presentation</b>         |                    |
| <20/200 – No PL                                   | 08 (24.24%)        | 1-7 days                                                              | 12 (36.36%)        |
| <b>4) Laterality</b>                              |                    | 8-14 days                                                             | 08 (24.24%)        |
| Right Eye                                         | 17 (51.51%)        | Beyond 14 days                                                        | 13 ( )             |
| Left Eye                                          | 16 (48.48%)        | <b>9) Duration between COVID infection and onset of ROCM symptoms</b> |                    |
| <b>5) Initial Presenting Hospital</b>             |                    | 1- 7 days                                                             | 06 (18.18%)        |
| General Hospital                                  | 14 (42.42%)        | 8-14 days                                                             | 12 (36.36%)        |
| Tertiary Eye Care Centre                          | 19 (57.58%)        | 15-21 days                                                            | 09 (27.27%)        |
| <b>6) COVID 19 Infection related Risk factors</b> |                    | Beyond 21 days                                                        | 06 (48.48%)        |
| Hospitalization                                   | 16 (48.48%)        |                                                                       |                    |

**Table S2: Clinical manifestations (N=33)**

| <b>Clinical Findings</b>               | <b>No of Patients (%)</b> | <b>Imaging and Endoscopy Findings</b>                   | <b>No of Patients (%)</b> |
|----------------------------------------|---------------------------|---------------------------------------------------------|---------------------------|
| <b>Ocular / Orbital</b>                |                           |                                                         |                           |
| Decreased Vision                       | 09 (27.27%)               | Orbital Bony erosion                                    | 06(18.18%)                |
| Ptosis                                 | 08 (24.24%)               | EOM Thickening                                          | 11 (33.33%)               |
| Ophthalmoplegia                        | 17 (51.52%)               | Medial Orbit involvement                                | 18 (54.55)                |
| Ocular and Periorbital Pain            | 22 (66.67%)               | Lateral Orbit Involvement                               | 01 (03.03%)               |
| Proptosis                              | 09 (27.27%)               | Superior + Medial + Inferior Orbit Involvement          | 01(03.03%)                |
| Lid edema                              | 14 (42.42%)               | Sub-periosteal abscess                                  | 01(03.03%)                |
| Lid abscess                            | 01(03.03%)                | Cavernous sinus and Orbital Apex                        | 09 (27.27%)               |
| Autoevisceration of globe              | 01 (03.03%)               | NA                                                      | -                         |
| Conjunctiva congestion                 | 13 (39.39%)               | NA                                                      | -                         |
| <b>Facial</b>                          |                           |                                                         |                           |
| Facial Edema                           | 16(48.48%)                | Pterygopalatine fossa Involvement                       | 01(03.03%)                |
| Facial Numbness & Paresthesia          | 06 (18.18%)               | NA                                                      | -                         |
| Skin Eschar                            | 01 (03.03%)               | NA                                                      | -                         |
| <b>Oral</b>                            |                           |                                                         |                           |
| Palatal Ulcer                          | 03 (09.09%)               | NA                                                      | -                         |
| Gingival edema with Loosening of Teeth | 05 (15.15%)               | NA                                                      | -                         |
| <b>Nasal</b>                           |                           |                                                         |                           |
| Nasal Discharge                        | 12 (36.36%)               | Normal Sinuses                                          | 03 (09.09%)               |
| Nasal Bleed                            | 07 (21.21%)               | Isolated Ethmoid Sinusitis                              | 03 (09.09%)               |
| Eschar on nasal cavity                 | 14 (42.42%)               | Isolated Maxillary Sinusitis                            | 05 (15.15%)               |
| NA                                     | -                         | Ethmoid + Maxillary Sinusitis                           | 11 (33.33%)               |
| NA                                     | -                         | Ethmoid + Maxillary + Frontal                           | 04 (12.12%)               |
| NA                                     | -                         | Ethmoid + Sphenoid +Maxillary                           | 03 (09.09%)               |
| NA                                     | -                         | Pansinusitis (Ethmoid + Maxillary + Frontal + Sphenoid) | 04 (12.12%)               |

**Table S3: Diagnostic performance of PCR assay and nucleotide sequencing**

| Patient SI No | Lab Id | Sample type    | Culture report          | Identification of Fungus after LPCB | PCR Results       | Identification of fungus after sequencing | Accession number assigned                       |
|---------------|--------|----------------|-------------------------|-------------------------------------|-------------------|-------------------------------------------|-------------------------------------------------|
| 1             | 570/21 | Nasal biopsy   | S/o Mucor               | Rhizopus sp.                        | Mucor             | R. oryzae                                 | MZ412886                                        |
| 2             | 579/21 | Nasal biopsy   | S/o Mucor               | Rhizopus sp.                        | Mucor             | R. oryzae                                 |                                                 |
|               | 579/21 | Orbital mass   | S/o Mucor               | Rhizopus sp.                        | Mucor             | R. oryzae                                 | MZ412887                                        |
| 3             | 584/21 | Nasal biopsy   | No growth               | NA                                  | Negative          | Not done                                  | NA                                              |
|               | 584/21 | Orbital mass   | Fungus                  | Aspergillus niger                   | Fungus            | A. niger                                  | MZ412888                                        |
|               | 584/21 | Endonasal swab | No growth               | NA                                  | Fungus            | A. niger                                  | NA                                              |
| 4             | 585/21 | Nasal biopsy   | S/o Mucor               | Rhizopus sp.                        | Mucor             | R. oryzae                                 | MZ412889                                        |
|               | 585/21 | Endonasal swab | No growth               | NA                                  | Mucor             | R. oryzae                                 | NA                                              |
| 5             | 592/21 | Nasal biopsy   | Fungus                  | Unidentified hyaline fungus         | Mucor & Fungus    | Not done                                  |                                                 |
|               | 592/21 | Orbital mass   | Fungus                  | Unidentified hyaline fungus         | Fungus            | Schizophyllum commune                     | MZ540883                                        |
|               | 592/21 | Endonasal swab | No growth               | NA                                  | Mucor             | R. oryzae                                 | MZ412890                                        |
| 6             | 595/21 | Nasal biopsy   | Fungus                  | Asperigilus flavus                  | Mucor & Fungus    | R. oryzae and A. flavus                   | MZ416884<br>R. oryzae<br>MZ434748<br>A. flavus  |
|               | 595/21 | Endonasal swab | No growth               | NA                                  | Negative for both | Not done                                  |                                                 |
| 7             | 598/21 | Nasal biopsy   | S/o Mucor               | Rhizopus sp.                        | Mucor & Fungus    | R. oryzae                                 | MZ412892                                        |
|               | 598/21 | Endonasal swab | Fungus                  | Asperigilus flavus                  | Negative for both | Not done                                  |                                                 |
| 8             | 607/21 | Nasal biopsy   | No growth               | NA                                  | Fungus            | Penicillium sclerotiorum                  | MZ434750                                        |
|               | 607/21 | Endonasal swab | No growth               | NA                                  | Negative for both | Not done                                  |                                                 |
| 9             | 616/21 | Nasal biopsy   | S/o Mucor and A. Flavus | Rhizopus sp.&A. flavus              | Mucor & Fungus    | R. delemar & A. flavus                    | MZ434749<br>A. flavus<br>MZ412891<br>R. delemar |
|               | 616/21 | Endonasal swab | No growth               | ND                                  | Mucor & Fungus    | Not done                                  |                                                 |
|               | 616/21 | Orbital mass   | No growth               | NA                                  | Mucor & Fungus    | Malassezia restricta                      | MZ648416<br>M.restricta                         |
| 10            | 632/21 | Nasal biopsy   | S/o Mucor               | Rhizopus sp.                        | Mucor & Fungus    | R. oryzae                                 | MZ412893                                        |
|               | 632/21 | Endonasal swab | No growth               | NA                                  | Mucor & Fungus    | Malassezia restricta                      | MZ648415                                        |
| 11            | 636/21 | Nasal biopsy   | Fungus (Candida sp.)    | Candida albicans                    | Mucor & Fungus    | R. delemar                                | MZ412895                                        |

|    |        |                |           |                             |                   |                                    |          |
|----|--------|----------------|-----------|-----------------------------|-------------------|------------------------------------|----------|
|    | 636/21 | Endonasal swab | No growth | NA                          | Mucor & Fungus    | Candida glabrosa                   | MZ416886 |
| 12 | 637/21 | Nasal biopsy   | No growth | NA                          | Mucor & Fungus    | R. oryzae                          | MZ412896 |
|    | 637/21 | Endonasal swab | No growth | NA                          | Mucor & Fungus    | Not identified (Faint band)        |          |
| 13 | 654/21 | Nasal biopsy   | No growth | NA                          | Mucor & Fungus    | Not identified (Faint band)        |          |
|    | 654/21 | Endonasal swab | No growth | NA                          | Mucor & Fungus    | Not identified (Faint band)        |          |
|    | 654/21 | Control        | No growth | NA                          | Negative for both | Not identified (Faint band)        |          |
| 14 | 655/21 | Nasal biopsy   | S/o Mucor | Rhizopus sp.                | Mucor & Fungus    | R. oryzae                          | MZ416887 |
|    | 655/21 | Endonasal swab | No growth | NA                          | Fungus            | Not identified due to faint band   |          |
| 15 | 681/21 | Nasal biopsy   | No growth | NA                          | Mucor & Fungus    | R. oryzae                          | MZ434751 |
|    | 681/22 | Endonasal swab | No growth | NA                          | Mucor & Fungus    | Malassezia restricta               | MZ540428 |
| 16 | 685/21 | Nasal biopsy   | Fungus    | Unidentified hyaline fungus | Mucor & Fungus    | Not identified due to faint bands  |          |
|    | 685/22 | Endonasal swab | Fungus    | Asperigillus niger          | Mucor & Fungus    |                                    |          |
|    | 685/23 | Orbital mass   | No growth | Not done                    | Mucor             | Not identified due to faint bands. |          |
| 17 | 691/21 | Nasal biopsy   | S/o Mucor | Rhizopus sp.                | Mucor & Fungus    | Rhizopus oryzae                    | MZ648417 |
|    | 691/22 | Endonasal swab | No growth |                             | Mucor & Fungus    | Rhizopus oryzae                    |          |
|    | 691/21 | Orbital mass   | S/o Mucor | Rhizopus sp.                | Fungus            | Citeromyces matritensis            | MZ684136 |
|    | 691/24 | Brain tissue   | No growth | NA                          | Mucor             | Rhizopus oryzae                    |          |
| 18 | 733/21 | Nasal biopsy   | No growth | NA                          | Mucor & Fungus    | Citeromyces matritensis            | MZ540430 |
|    | 733/22 | Endonasal swab | No growth | NA                          | Mucor & Fungus    |                                    |          |
| 19 | 738/21 | Nasal biopsy   | No growth | NA                          | Mucor & Fungus    | Not identified due to faint bands. |          |
|    | 738/22 | Endonasal swab | No growth | NA                          | Fungus            | Citeromyces matritensis            | MZ540431 |
| 20 | 762/21 | Nasal biopsy   | No growth | NA                          | Fungus            | Citeromyces matritensis            | MZ648419 |
| 21 | 791/21 | Nasal biopsy   | No growth | NA                          | Fungus            | Candida glabrosa                   | MZ684138 |
|    | 791/22 | Endonasal swab | No growth | NA                          | Mucor             | R. microsporous                    | MZ684139 |
| 22 | 795/21 | Nasal biopsy   | No growth | NA                          | Fungus            | Schizophyllum commune              | MZ684140 |
|    | 795/22 | Endonasal swab | No growth | NA                          | Negative for both | NA                                 |          |
| 23 | 796/21 | Nasal biopsy   | No growth | NA                          | Negative for both | NA                                 |          |
| 24 | 798/21 | Nasal biopsy   | No growth | NA                          | Fungus            | Candida glabrosa                   | MZ701974 |
|    | 798/22 | Endonasal swab | No growth | NA                          | Negative for both | Not done                           |          |

|    |         |                |                      |                            |                   |                                    |          |
|----|---------|----------------|----------------------|----------------------------|-------------------|------------------------------------|----------|
| 25 | 833/21  | Nasal Biopsy   | No growth            | NA                         | Mucor & Fungus    | Not identified due to faint bands. |          |
|    | 833/22  | Endonasal Swab | No growth            | NA                         | Mucor & Fungus    | Not identified due to faint bands. |          |
| 26 | 834/21  | Nasal Biopsy   | No growth            | NA                         | Mucor & Fungus    | Not identified due to faint bands. |          |
|    | 834/22  | Endonasal Swab | Fungus               | UIH                        | Fungus            | Coprinopsis cinerea                | MZ701975 |
| 27 | 835/21  | Endonasal Swab | No growth            | NA                         | Mucor & Fungus    | Not identified due to faint bands. |          |
| 28 | 1135/21 | Endonasal Swab | No growth            | NA                         | Fungus            | Malassezia restricta               | MZ416888 |
| 29 | 995/21  | Nasal Biopsy   | Fungus               | Exserohilum Species        | Fungus            | Not identified due to faint bands. |          |
|    |         | Endonasal Swab | No growth            | NA                         | Fungus            | Not identified due to faint bands. |          |
| 30 | 1077/21 | Nasal Biopsy   | No growth            | NA                         | Mucor & Fungus    | Not identified due to faint bands. |          |
|    |         | Endonasal Swab | No growth            | NA                         | Negative for both | NA                                 |          |
| 31 | 590/21  | Nasal biopsy   | No growth            | NA                         | Negative for both | NA                                 |          |
| 32 | 1145/21 | Nasal Biopsy   | Fungus (Candida sp.) | Candida sp.                | Fungus            | Candida duobushaemulon ii          | OK523373 |
|    |         | Endonasal Swab | No growth            |                            | Fungus            | NA                                 |          |
|    | 1195/21 | Lid abscess    | Mucor and Fungus     | Rhizopus sp. & Asp. Flavus | Mucor and Fungus  | Not identified due to faint bands. |          |
| 33 | 1118/21 | Orbital mass   | Fungus               | UIH                        | Fungus            | Nectaromyces rattus                | OK523372 |
